# Supplementary material for: Transcriptional Profiles of Mitochondrial Dynamics Markers Are Disturbed in Adrenal Glands of Stressed Adult Male Rats
Source: MDPI journal article supplement (doi:10.3390/life13071457), 2023-06-27
Supplement: s1 [file s1]

Manuscript Title

# Transcriptional Profiles of Mitochondrial Dynamics Markers Are Disturbed in Adrenal Glands of Stressed Adult Male Rats

Authors

Isidora M. Keselj<sup>1</sup>, Filip N. Bozic<sup>1</sup>, Miodrag M. Vucinic<sup>1</sup>, Dusan Lalosevic<sup>2</sup>, Tatjana S. Kostic<sup>1</sup> and Silvana A. Andric<sup>1,\*</sup>

Affiliation

<sup>1</sup>Laboratory for Reproductive Endocrinology and Signaling, Laboratory for Chronobiology and Aging, CeRES, DBE, Faculty of Sciences, University of Novi Sad, 21000 Novi Sad, Serbia

<sup>2</sup>Medical Faculty, University of Novi Sad, 21000 Novi Sad, Serbia

\*Correspondence

Silvana A Andric, PhD, professor

Head of Laboratory for Reproductive Endocrinology and Signaling

Member of Laboratory for Chronobiology and Aging

Head of accredited Center of Excellence for Reproductive Endocrinology

Faculty of Sciences, University of Novi Sad

Dositeja Obradovica Square 2, 21000 Novi Sad, Serbia

Tel. +381-21-485-2673 (office); +381-63-748-4403 (mobile); Fax: +381-21-450-620

E-mail: silvana.andric@dbe.uns.ac.rs

Web: <http://wwwold.dbe.pmf.uns.ac.rs/en/nauka-eng/lares>

Supplementary information file contains two sections, supplementary material and methods section and supplementary results section.

## SUPPLEMENTARY MATERIAL AND METHODS

**Supplementary Table S1.** Key resources table

| Resource or reagent                              | Source                                                                                     | Identifier                                                                                                          |
|--------------------------------------------------|--------------------------------------------------------------------------------------------|---------------------------------------------------------------------------------------------------------------------|
| <b>Experimental model and biological samples</b> |                                                                                            |                                                                                                                     |
| <i>Wistar</i> rat                                | LaRES and ChronAge Laboratories (DBE, Faculty of Sciences, University of Novi Sad, Serbia) | <a href="http://wwwold.dbe.pmf.uns.ac.rs/en/nauka-eng/lares">http://wwwold.dbe.pmf.uns.ac.rs/en/nauka-eng/lares</a> |
| Adrenal gland                                    | Three months-old male rats                                                                 | NA                                                                                                                  |
| <b>Commercial Reagents/Assays</b>                |                                                                                            |                                                                                                                     |
| TRIzol™ Reagent                                  | Invitrogen™, Thermo Fisher Scientific, USA                                                 | <a href="https://www.thermofisher.com">https://www.thermofisher.com</a>                                             |
| DNase I (RNase-free) treatment                   | New England Biolabs, USA                                                                   | <a href="https://international.neb.com">https://international.neb.com</a>                                           |
| High Capacity Kit for cDNA                       | Applied Biosystems/Thermo Fisher Scientific, USA                                           | <a href="https://www.thermofisher.com">https://www.thermofisher.com</a>                                             |
| Power SYBR® Green PCR Master Mix                 | Applied Biosystems/Thermo Fisher Scientific, USA                                           | <a href="https://www.thermofisher.com">https://www.thermofisher.com</a>                                             |
| <b>Primers</b>                                   |                                                                                            |                                                                                                                     |
| Supplementary Tables S2 to S7                    | This paper                                                                                 | <a href="http://www.ncbi.nlm.nih.gov/sites/entrez">www.ncbi.nlm.nih.gov/sites/entrez</a>                            |
| <b>Characteristics of the antibodies</b>         |                                                                                            |                                                                                                                     |
| Supplementary Table S8                           | This paper                                                                                 |                                                                                                                     |
| <b>Software</b>                                  |                                                                                            |                                                                                                                     |
| GraphPad Prism 8 Software                        | GraphPad Prism                                                                             | <a href="https://www.graphpad.com/scientific-software/prism">https://www.graphpad.com/scientific-software/prism</a> |

**Supplementary Table S2.** Primers sequences used for the real-time PCR analysis of molecular markers of mitochondrial biogenesis.

| Gene            | Accession code | Primers                                                             | Primer length  | Product length | AV Ct |        |         |
|-----------------|----------------|---------------------------------------------------------------------|----------------|----------------|-------|--------|---------|
|                 |                |                                                                     |                |                | Whole | Cortex | Medulla |
| <i>Ppargc1a</i> | NM_031347      | F: 5'-AGCCGTAGGCCCAGGTATGACA-3'<br>R: 5'-TGCTTGGCCCTTTCAGACTCCC-3'  | 22 bp<br>22 bp | 107 bp         | 28.37 | 28.80  | 27.60   |
| <i>Ppargc1b</i> | NM_176075      | F: 5'-ACCTTCCGGTGTTCGGAGCATG-3'<br>R: 5'-GTGGAAGGAGGGCTCATTGCGT-3'  | 22 bp<br>22 bp | 81 bp          | 29.12 | 28.10  | 27.95   |
| <i>Tfam</i>     | NM_031326      | F: 5'-TATAGTCGTCGGCCCCGAGGGAT-3'<br>R: 5'-AAGGCTGACAGGCGAGGGTATG-3' | 22 bp<br>22 bp | 125 bp         | 26.31 | 25.65  | 26.37   |
| <i>Nrf1</i>     | NM_001100708   | F: 5'-GACCATCCAGACGACGCAAGCA-3'<br>R: 5'-ATGGGCGGCAGCTTCACTGTT-3'   | 22 bp<br>21 bp | 136 bp         | 26.19 | 26.44  | 26.01   |
| <i>Nrf2a</i>    | NM_001108841   | F: 5'-AGCGGAAGTGAACCGCTTGGT-3'<br>R: 5'-GTGACTGGCTGAGCAATCCCGT-3'   | 21 bp<br>22 bp | 84 bp          | 24.55 | 24.34  | 24.14   |
| <i>Ppara</i>    | NM_013196      | F: 5'-GTCCTGGAAGTGAAGCGACGCT-3'<br>R: 5'-TTACGCCCAAATGCACCACGC-3'   | 22 bp<br>21 bp | 110 bp         | 29.37 | 29.16  | 28.48   |
| <i>Ppard</i>    | NM_013141      | F: 5'-ACGGTAAAGGCGGTCCATCTGC-3'<br>R: 5'-TCCTCCTGTGGCTGTTCCATGAC-3' | 22 bp<br>23 bp | 109 bp         | 26.78 | 26.82  | 25.00   |
| <i>mtNd1</i>    |                | F: 5' GCGTGGGAGGAGCATCAGGG 3'<br>R: 5' GCGAATGGTCTCGGCGT A 3'       | 20 bp<br>20 bp | 271 bp         | 17.46 | 17.22  | 17.88   |
| <i>Gapdh</i>    | NM_017008      | F: 5'-TGCCAAGTATGATGACATCAAGAAG-3'<br>R: 5'-AGCCCAGGATGCCCTTTAGT-3' | 25 bp<br>20 bp | 110 bp         | 18.89 | 19.00  | 20.48   |

Primers were designed by using software Primer Express 3.0 (Applied Biosystems) and full genes sequences from the NCBI Entrez Nucleotide database ([www.ncbi.nlm.nih.gov/sites/entrez](http://www.ncbi.nlm.nih.gov/sites/entrez)). F - forward; R - reverse.

**Supplementary Table S3.** Primers sequences used for the real-time PCR analysis of molecular markers of mitochondrial fusion and architecture.

| Gene         | Accession code | Primers                                                              | Primer length  | Product length | AV Ct |        |         |
|--------------|----------------|----------------------------------------------------------------------|----------------|----------------|-------|--------|---------|
|              |                |                                                                      |                |                | Whole | Cortex | Medulla |
| <i>Mfn1</i>  | NM_138976.1    | F: 5'-CCTTGATACATCGATTCTGGGTTTC-3'<br>R: 5'-CCTGGGCTGCATTATCTGGTG-3' | 24 bp<br>21 bp | 143 bp         | 21.68 | 22.71  | 23.37   |
| <i>Mfn2</i>  | NM_130894.4    | F: 5'-TCAAGCGCCAGTTTGTGGAG-3'<br>R: 5'-CACAGATGAGCAAATGTCCCAGA-3'    | 20 bp<br>23 bp | 118 bp         | 22.02 | 22.78  | 23.20   |
| <i>Opa1</i>  | NM_133585.3    | F: 5'-AAAAGCCCTTCCCAGTTCAGA-3'<br>R: 5'-TACCCGCAGTGAAGAAATCCTT-3'    | 21 bp<br>22 bp | 101 bp         | 21.79 | 22.17  | 22.84   |
| <i>Gapdh</i> | NM_017008      | F: 5'-TGCCAAGTATGATGACATCAAGAAG-3'<br>R: 5'-AGCCCAGGATGCCCTTTAGT-3'  | 25 bp<br>20 bp | 110 bp         | 16.59 | 17.45  | 17.45   |

Primers were designed by using software Primer Express 3.0 (Applied Biosystems) and full genes sequences from NCBI Entrez Nucleotide database ([www.ncbi.nlm.nih.gov/sites/entrez](http://www.ncbi.nlm.nih.gov/sites/entrez)). F - forward; R - reverse.

**Supplementary Table S4.** Primers sequences used for the real-time PCR analysis of molecular markers of mitochondrial fission.

| Gene         | Accession code | Primers                                                             | Primer length  | Product length | AV Ct |        |         |
|--------------|----------------|---------------------------------------------------------------------|----------------|----------------|-------|--------|---------|
|              |                |                                                                     |                |                | Whole | Cortex | Medulla |
| <i>Fis1</i>  | NM_001105919.1 | F: 5'-ACGCCTGCCGTTACTTCTTC-3'<br>R: 5'-GCAACCCTGCAATCCTTCAC-3'      | 20 bp<br>20 bp | 108 bp         | 22.79 | 24.62  | 24.60   |
| <i>Drp1</i>  | NM_053655.3    | F: 5'-AGGTTGCCCGTGACAAATGA-3'<br>R: 5'-CACAGGCATCAGCAAAGTCG-3'      | 20 bp<br>20 bp | 94 bp          | 22.02 | 22.73  | 23.55   |
| <i>Gapdh</i> | NM_017008      | F: 5'-TGCCAAGTATGATGACATCAAGAAG-3'<br>R: 5'-AGCCCAGGATGCCCTTTAGT-3' | 25 bp<br>20 bp | 110 bp         | 16.59 | 17.45  | 17.45   |

Primers were designed by using software Primer Express 3.0 (Applied Biosystems) and full genes sequences from NCBI Entrez Nucleotide database ([www.ncbi.nlm.nih.gov/sites/entrez](http://www.ncbi.nlm.nih.gov/sites/entrez)). F - forward; R - reverse.

**Supplementary Table S5.** Primers sequences used for the real-time PCR analysis of molecular markers of mitochondrial autophagy.

| Gene         | Accession code | Primers                                                             | Primer length  | Product length | AV Ct |        |         |
|--------------|----------------|---------------------------------------------------------------------|----------------|----------------|-------|--------|---------|
|              |                |                                                                     |                |                | Whole | Cortex | Medulla |
| <i>Pink1</i> | NM_001106694.1 | F: 5'-CAAGCAAGTGTCTGACCCAC-3'<br>R: 5'-GCTTCATACACAGCGGCATT-3'      | 20 bp<br>20 bp | 111 bp         | 21.12 | 21.16  | 21.98   |
| <i>Prkn</i>  | NM_020093.1    | F: 5'-CTTCCAGCTCAAGGAAGTGG-3'<br>R: 5'-CAGAGGCATTTGTTTCGTGA-3'      | 20 bp<br>20 bp | 182 bp         | 24.74 | 28.94  | 26.34   |
| <i>Gapdh</i> | NM_017008      | F: 5'-TGCCAAGTATGATGACATCAAGAAG-3'<br>R: 5'-AGCCCAGGATGCCCTTTAGT-3' | 25 bp<br>20 bp | 110 bp         | 16.59 | 17.45  | 17.45   |

Primers were designed by using software Primer Express 3.0 (Applied Biosystems) and full genes sequences from NCBI Entrez Nucleotide database ([www.ncbi.nlm.nih.gov/sites/entrez](http://www.ncbi.nlm.nih.gov/sites/entrez)). F - forward; R - reverse.

**Supplementary Table S6.** Primers sequences used for the real-time PCR analysis of molecular markers of mitochondrial functionality.

| Gene          | Accession code | Primers                                                              | Primer length  | Product length | AV Ct |        |         |
|---------------|----------------|----------------------------------------------------------------------|----------------|----------------|-------|--------|---------|
|               |                |                                                                      |                |                | Whole | Cortex | Medulla |
| <i>Cox4i1</i> | NM_017202      | F: 5'-CGCTGAGATGAACAAGGGCACC-3'<br>R: 5'-TCCCAGATCAGCACAAGCGCA-3'    | 22 bp<br>21 bp | 93 bp          | 21.06 | 22.45  | 20.48   |
| <i>Cox4i2</i> | NM_053472      | F: 5'-CACAGCCCAGGAAGTGCTGCTA-3'<br>R: 5'-TGTGCAGTAAGGCTCATCCGGC-3'   | 22 bp<br>22 bp | 105 bp         | 27.33 | 29.11  | 27.02   |
| <i>Cytc</i>   | NM_012839      | F: 5'-GCAAGCATAAGACTGGACCAAA-3'<br>R: 5'-TGTTGGCATCTGTGTAAGAGAATC-3' | 22 bp<br>25 bp | 88 bp          | 21.87 | 23.22  | 22.39   |
| <i>Ucp1</i>   | NM_012682      | F: 5'-TCAGCTCTTGTGCGCCGGTTT-3'<br>R: 5'-TGCACAGCTGGGTACACTTGGG-3'    | 21 bp<br>22 bp | 114 bp         | 30.77 | 28.54  | 32.52   |
| <i>Ucp2</i>   | NM_019354      | F: 5'-ACGACCTCCCTTGCCACTTCAC-3'<br>R: 5'-GGTACTGGCCCAAGGCAGAGTT-3'   | 22 bp<br>22 bp | 117 bp         | 19.60 | 19.59  | 20.32   |
| <i>Ucp3</i>   | NM_013167      | F: 5'-TGCTCAACCCACGGATGTGGT-3'<br>R: 5'-CCTGGCGATGGTCTGTAGGCA-3'     | 21 bp<br>22 bp | 112 bp         | 26.54 | 28.05  | 27.44   |
| <i>Gapdh</i>  | NM_017008      | F: 5'-TGCCAAGTATGATGACATCAAGAAG-3'<br>R: 5'-AGCCCAGGATGCCCTTTAGT-3'  | 25 bp<br>20 bp | 110 bp         | 18.89 | 19.00  | 20.48   |

Primers were designed by using software Primer Express 3.0 (Applied Biosystems) and full genes sequences from the NCBI Entrez Nucleotide database ([www.ncbi.nlm.nih.gov/sites/entrez](http://www.ncbi.nlm.nih.gov/sites/entrez)). F - forward; R - reverse.

**Supplementary Table S7.** Primers sequences used for the real-time PCR analysis of adrenergic receptor, adrenergic receptor kinases and glucocorticoid receptor.

| Gene          | Accession code | Primers                                                             | Primer length  | Product length | AV Ct |        |         |
|---------------|----------------|---------------------------------------------------------------------|----------------|----------------|-------|--------|---------|
|               |                |                                                                     |                |                | Whole | Cortex | Medulla |
| <i>Adra1d</i> | NM_024483      | F: 5'-GAAGGTGATGGGTTATGGTG-3'<br>R: 5'-GAAGCCATAGCTGAAGCCT-3'       | 20 bp<br>19 bp | 152 bp         | 27.27 | 26.65  | 26.52   |
| <i>Adrb1</i>  | NM_012701      | F: 5'-TGCCCATCCTCATGCACTGGTG-3'<br>R: 5'-GTAGGCCCGGTTGGTGACGAAA-3'  | 22 bp<br>22 bp | 98 bp          | 32.81 | 30.46  | 26.98   |
| <i>Adrb2</i>  | NM_012492      | F: 5'-CGCCCTCAAGTACCAGAGCCT-3'<br>R: 5'-TTGCTTGTGGGTGGCACGGT-3'     | 22 bp<br>20 bp | 131 bp         | 28.55 | 28.20  | 26.19   |
| <i>Adrbk1</i> | NM_012776      | F: 5'-GCAGCGAGTGCCCAAGATGAAG-3'<br>R: 5'-CACTGCCACGCTGAATCAGTGG-3'  | 22 bp<br>22 bp | 83 bp          | 25.29 | 25.75  | 28.72   |
| <i>Adrbk2</i> | NM_012897      | F: 5'-GAGCTGACGTGCACCTTCAACG-3'<br>R: 5'-GATGGCGGCACGTGGTTGT-3'     | 22 bp<br>20 bp | 81 bp          | 27.42 | 28.52  | 27.87   |
| <i>Nr3c1</i>  | NC_005117.4    | F: 5'-CGGTAAATCTGCACAGCCTAT-3'<br>R: 5'-AAAATGGGTCGGTGCTTCTA-3'     | 21 bp<br>20 bp | 147 bp         | 24.91 | 26.23  | 24.57   |
| <i>Gapdh</i>  | NM_017008      | F: 5'-TGCCAAGTATGATGACATCAAGAAG-3'<br>R: 5'-AGCCCAGGATGCCCTTTAGT-3' | 25 bp<br>20 bp | 110 bp         | 18.86 | 19.16  | 19.08   |

Primers were designed by using software Primer Express 3.0 (Applied Biosystems) and full genes sequences from the NCBI Entrez Nucleotide database ([www.ncbi.nlm.nih.gov/sites/entrez](http://www.ncbi.nlm.nih.gov/sites/entrez)). F - forward; R – reverse.

**Supplementary Table S8. The characteristics of the antibodies.**

| Target            | Name of Antibody                        | Antigen sequence                                                                                                   | Manufacturer, catalog #                                                   | Mono- or polyclonal        | Dil. used |
|-------------------|-----------------------------------------|--------------------------------------------------------------------------------------------------------------------|---------------------------------------------------------------------------|----------------------------|-----------|
| PGC1 alpha        | PGC1 alpha polyclonal antibody          | Synthetic peptide CVRTYWLLGERGCSTRG (C terminal)                                                                   | Invitrogen<br>Catalog # PA1-31202<br>Mw (PGC-1) = 91 kDa                  | Rabbit polyclonal antibody | 1:500     |
| MFN1              | Mfn1 (D-10): sc-166644                  | Antibody raised against amino acids 10-74 mapping within an N-terminal cytoplasmic domain of Mfn1 of human origin. | Santa Cruz Biotechnology Inc.<br>sc-166644<br>Mw (MFN1) = 86 kDa          | Mouse monoclonal antibody  | 1:100     |
| MFN2              | Mfn2 (F-5): sc-515647                   | Antibody raised against amino acids 461-528 mapping within a cytoplasmic domain of Mfn2 of human origin            | Santa Cruz Biotechnology Inc.<br>sc-515647<br>Mw (MFN2) = 86 kDa          | Mouse monoclonal antibody  | 1:100     |
| PRKAc             | Purified Mouse Anti-PKA[C]              | Humaofjfn PKA[Ca] subunit aa. 18-347                                                                               | BD Transduction Laboratories™<br>610980<br>MW (PRKAc)= 40 kDa             | Mouse monoclonal antibody  | 1:500     |
| AMPK $\alpha$ 1/2 | AMPK alpha 1/2 Antibody (D-6): sc-74461 | Antibody raised against amino acids 251-550 mapping at the C-terminus of AMPK $\alpha$ 1 of human origin           | Santa Cruz Biotechnology Inc.<br>sc-74461<br>Mw (AMPK alpha 1/2) = 63 kDa | Mouse monoclonal antibody  | 1:100     |
| ACTIN             | Actin (C-2): sc-8432                    | Antibody specific for an epitope mapping between amino acids 350-375 at the C-terminus of Actin of human origin    | Santa Cruz Biotechnology Inc.<br>sc-8432<br>Mw (ACTIN) = 43 kDa           | Rabbit polyclonal antibody | 1:100     |

#### Histological analysis

Isolated adrenal glands were fixed in Bouin's solution; the 5 mm thick sections were dehydrated in isopropyl alcohol, embedded in paraffin, and cut on a rotary microtome (Leica, Germany) at 5  $\mu$ m. Hematoxylin-eosin (H&E) staining was performed, and visualization was done by Leica optical microscope with digital camera.

## SUPPLEMENTARY RESULTS

### Repeated stress increased weight of the whole adrenal glands.

After psychophysical stress by immobilization of adult male rats, whole adrenal glands were isolated and measured. Results show increased weight of adrenal gland, where statistically significant increase was detected in 2xIMO and 10xIMO groups (Supplementary Figure S1).

**Adrenal gland weight**

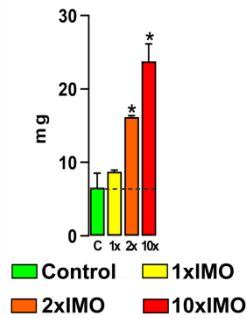

### Supplementary Figure S1. Weight of the whole adrenal glands of stressed adult male rats.

Adult male rats were subjected to psychophysical stress by immobilization. Briefly, stressed (IMO) rats were bound in a supine position to a wooden board by fixing the rats' limbs using thread, while the head motion was not limited. In each experiment, unstressed, freely moving animals were used as a control group. To analyze the effect of psychophysical stress, animals were subjected to immobilization stress once (1xIMO) for two hours, or repeatedly for two (2xIMO) and ten (10xIMO) consecutive days, in the duration of two hours at the same period during the day (from 07:00 AM to 9:00 AM). At the end of the experimental period, control and stressed animals were quickly decapitated without anesthesia, and adrenal glands were isolated. After isolation, adrenal gland were measured.

### **Fascicular layer of adrenals of control and stressed animals.**

Histological structure of stressed and control animals is generally preserved, but in stressed group a reduction of zona glomerulosa and reduction of lipid droplets in zona fasciculata are noted. Those changes represent activation of adrenals under stress, especially in fascicular layer.

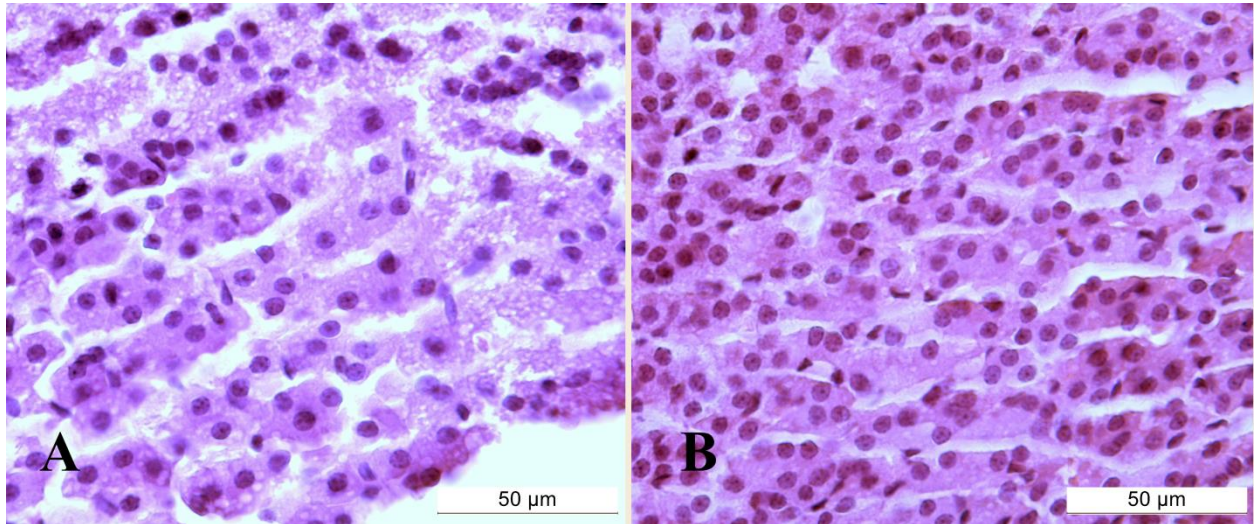

**Supplementary Figure S2. Fascicular layer of adrenals of control (A) and stressed animal (B).**

To analyze the effect of psychophysical stress, adult male rats were subjected to immobilization stress once (1xIMO) for two hours, or repeatedly for two (2xIMO) and ten (10xIMO) consecutive days, in the duration of two hours at the same period during the day (from 07:00 AM to 9:00 AM). In each experiment, unstressed, freely moving animals were used as a control group. At the end of the experimental period, control and stressed animals were quickly decapitated without anesthesia, and adrenal glands were isolated. Isolated adrenal glands were fixed in Bouin's solution; the 5 mm thick section was dehydrated in isopropyl alcohol, embedded in paraffin, and cut on a rotary microtome (Leica, Germany) at 5 µm. Hematoxylin-eosin (H&E) staining was performed, and visualization was done by Leica optical microscope with digital camera.

### **Immobilization stress disturbs circulating stress hormones**

To mimic psychophysical stress, adult male rats were subjected to immobilization stress once (1xIMO) for two hours, or repeatedly for two (2xIMO) and ten (10xIMO) consecutive days. In each experiment, unstressed, freely moving animals were used as a control group. At the end of the experimental period, control and stressed animals were quickly decapitated without anesthesia and trunk blood was collected. To verify the functionality of the treatment used in the present study, concentration of stress hormones corticosterone and adrenaline were measured in serum collected from undisturbed (control) and stressed animals. Results show that IMO was effective as a stressor (Supp. Figure 1), elevating serum adrenaline and CORT levels in all stressed groups comparing to undisturbed controls.

| <b>Group</b>   | <b>Adrenaline [pg/ml]</b> |            | <b>CORT [pmol/ml]</b> |            |
|----------------|---------------------------|------------|-----------------------|------------|
|                | <b>AV</b>                 | <b>SEM</b> | <b>AV</b>             | <b>SEM</b> |
| <b>Control</b> | 51.01                     | 2.02       | 12.87                 | 0.95       |
| <b>1xIMO</b>   | 156.43                    | 5.71       | 58.80                 | 2.04       |
| <b>2xIMO</b>   | 132.21                    | 4.92       | 80.00                 | 3.16       |
| <b>10xIMO</b>  | 111.25                    | 5.01       | 52.90                 | 1.97       |

**Supplementary Table S9. IMO disturbs circulating levels of stress hormones adrenaline and corticosterone.**



### $\Delta$ Ct values of the main mitochondrial biogenesis markers.

Analysis of relative expression of main mitochondrial biogenesis markers was done using delta delta Ct ( $\Delta\Delta$ Ct) method. In order to analyze difference in relative expression levels of main mitochondrial biogenesis markers in the whole adrenal gland, adrenal cortex and adrenal medulla,  $\Delta$ Ct values were used. Results show that there is no statistical difference in  $\Delta$ Ct values of all the analyzed mitochondrial biogenesis markers (Supplementary Figure S3).

### $\Delta$ Ct values of main mitochondrial biogenesis markers

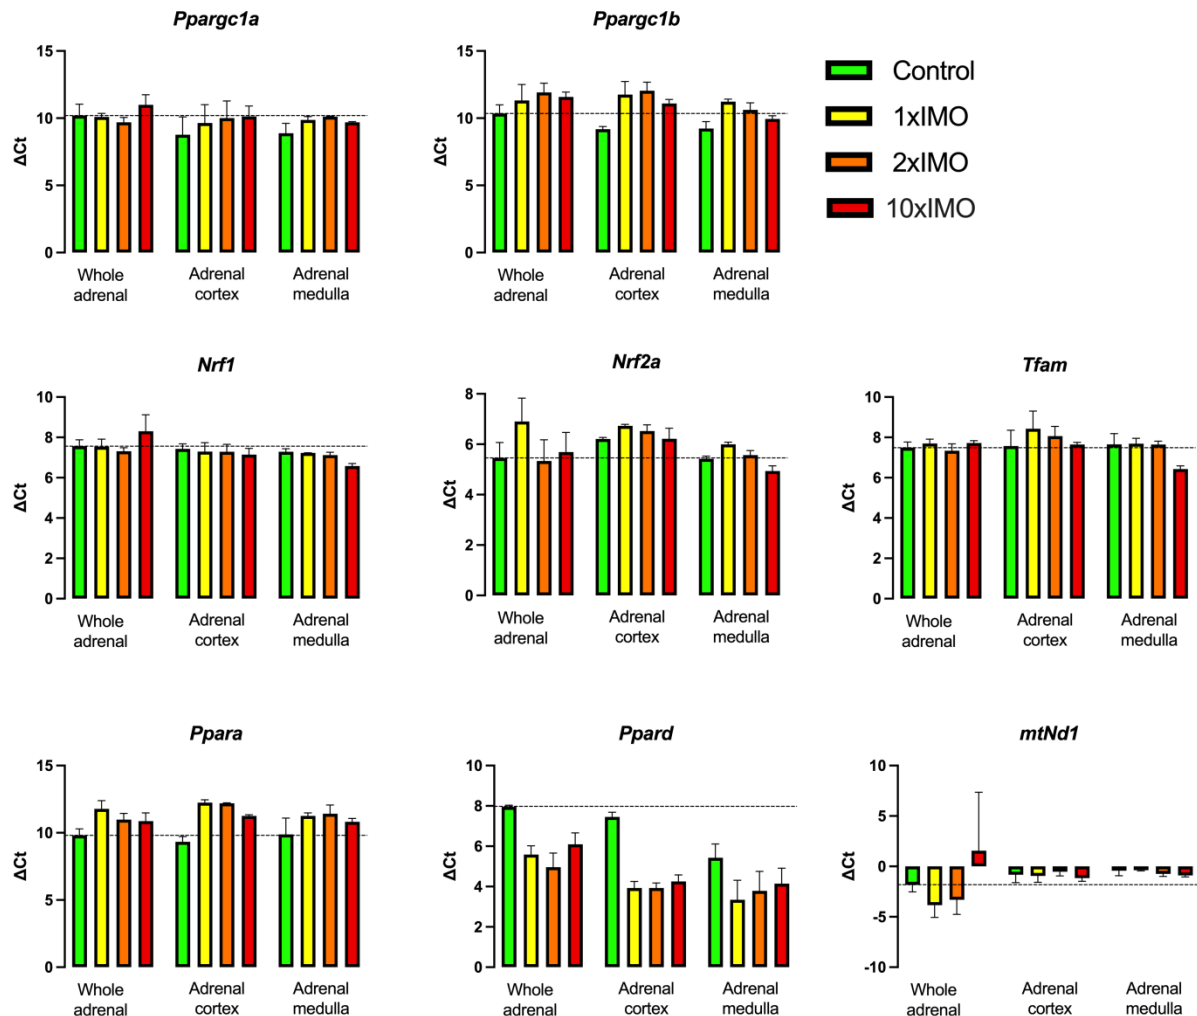

**Supplementary Figure S3.**  $\Delta$ Ct values of the main mitochondrial biogenesis markers in the whole adrenal gland, adrenal cortex and medulla tissues after one-time, two-times and ten-times repeated psychophysical stress of the entire organism.

Whole adrenal gland tissue, as well as the adrenal cortex and medulla tissues, were isolated from undisturbed, acutely (1xIMO) and repeatedly (2xIMO and 10xIMO) stressed rats. Tissue was further used for RNA isolation followed by the analysis of relative expression of mitochondrial biogenesis markers. The data bars represent mean  $\pm$  SEM values of two independent *in vivo* experiments.

### **$\Delta$ Ct values of the main mitochondrial fusion and architecture markers.**

Analysis of relative expression of main mitochondrial fusion and architecture markers was done using delta delta Ct ( $\Delta\Delta$ Ct) method. In order to analyze difference in relative expression levels of main fusion and architecture markers in the whole adrenal gland, adrenal cortex and adrenal medulla,  $\Delta$ Ct values were used. Results show that there is no statistical difference in  $\Delta$ Ct values of all the analyzed fusion and architecture (Supplementary Figure S4).

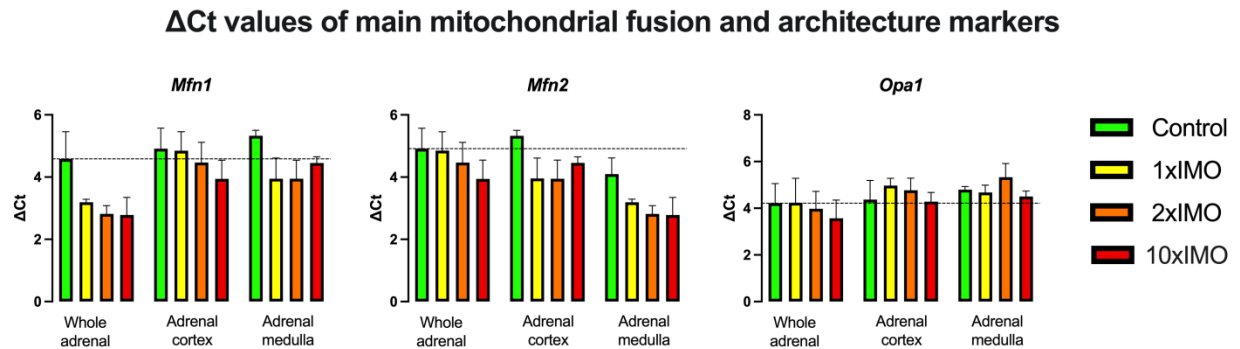

**Supplementary Figure S4.**  $\Delta$ Ct values of the main mitochondrial fusion and architecture markers in the whole adrenal gland, adrenal cortex and medulla tissues after one-time, two-times and ten-times repeated psychophysical stress of the entire organism.

Whole adrenal gland tissue, as well as the adrenal cortex and medulla tissues, were isolated from undisturbed, acutely (1xIMO) and repeatedly (2xIMO and 10xIMO) stressed rats. Tissue was further used for RNA isolation followed by the analysis of relative expression of mitochondrial fusion and architecture markers. The data bars represent mean  $\pm$  SEM values of two independent *in vivo* experiments.

### **$\Delta$ Ct values of the main mitochondrial fission markers.**

Analysis of relative expression of main mitochondrial fission markers was done using delta delta Ct ( $\Delta\Delta$ Ct) method. In order to analyze difference in relative expression levels of main markers of mitochondrial fission in the whole adrenal gland, adrenal cortex and adrenal medulla,  $\Delta$ Ct values were used. Results show that there is no statistical difference in  $\Delta$ Ct values of all the analyzed mitochondrial fission markers (Supplementary Figure S5).

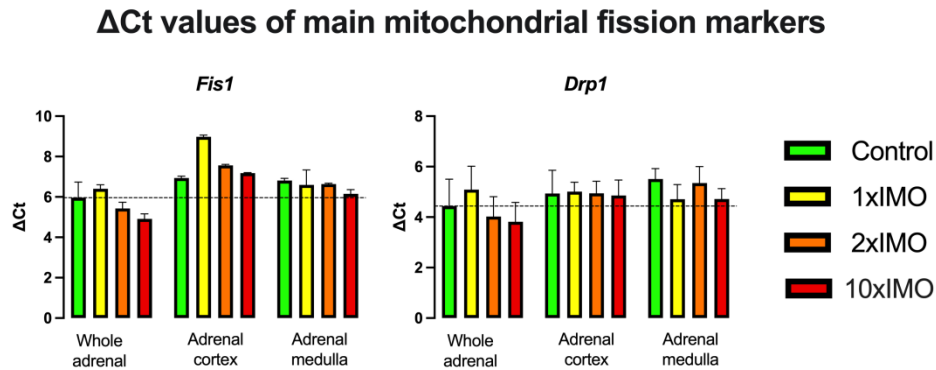

**Supplementary Figure S5.**  $\Delta$ Ct values of the main mitochondrial fission markers in the whole adrenal gland, adrenal cortex and medulla tissues after one-time, two-times and ten-times repeated psychophysical stress of the entire organism.

Whole adrenal gland tissue, as well as the adrenal cortex and medulla tissues, were isolated from undisturbed, acutely (1xIMO) and repeatedly (2xIMO and 10xIMO) stressed rats. Tissue was further used for RNA isolation followed by the analysis of relative expression of mitochondrial fission markers. The data bars represent mean  $\pm$  SEM values of two independent *in vivo* experiments.

### **$\Delta$ Ct values of the main markers of mitophagy.**

Analysis of relative expression of main mitochondrial autophagy markers was done using delta delta Ct ( $\Delta\Delta$ Ct) method. In order to analyze difference in relative expression levels of main markers of mitochondrial autophagy in the whole adrenal gland, adrenal cortex and adrenal medulla,  $\Delta$ Ct values were used. Results show that there is no statistical difference in  $\Delta$ Ct values of all the analyzed mitochondrial autophagy markers (Supplementary Figure S6).

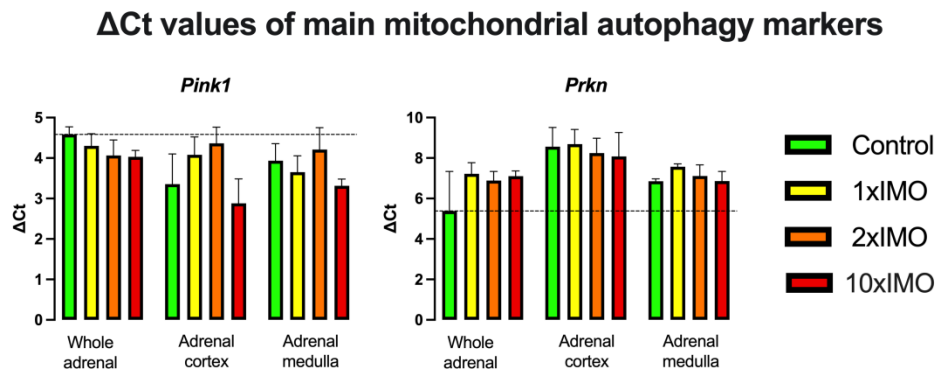

**Supplementary Figure S6.**  $\Delta$ Ct values of the main mitochondrial autophagy markers in the whole adrenal gland, adrenal cortex and medulla tissues after one-time, two-times and ten-times repeated psychophysical stress of the entire organism.

Whole adrenal gland tissue, as well as the adrenal cortex and medulla tissues, were isolated from undisturbed, acutely (1xIMO) and repeatedly (2xIMO and 10xIMO) stressed rats. Tissue was further used for RNA isolation followed by the analysis of relative expression of mitochondrial autophagy markers. The data bars represent mean  $\pm$  SEM values of two independent *in vivo* experiments.

### **$\Delta$ Ct values of the main mitochondrial functionality markers.**

Analysis of relative expression of main mitochondrial functionality markers was done using delta delta Ct ( $\Delta\Delta$ Ct) method. In order to analyze difference in relative expression levels of main markers of mitochondrial functionality in the whole adrenal gland, adrenal cortex and adrenal medulla,  $\Delta$ Ct values were used. Results show that there is no statistical difference in  $\Delta$ Ct values of all the analyzed mitochondrial functionality markers (Supplementary Figure S7).

## $\Delta$ Ct values of main mitochondrial functionality markers

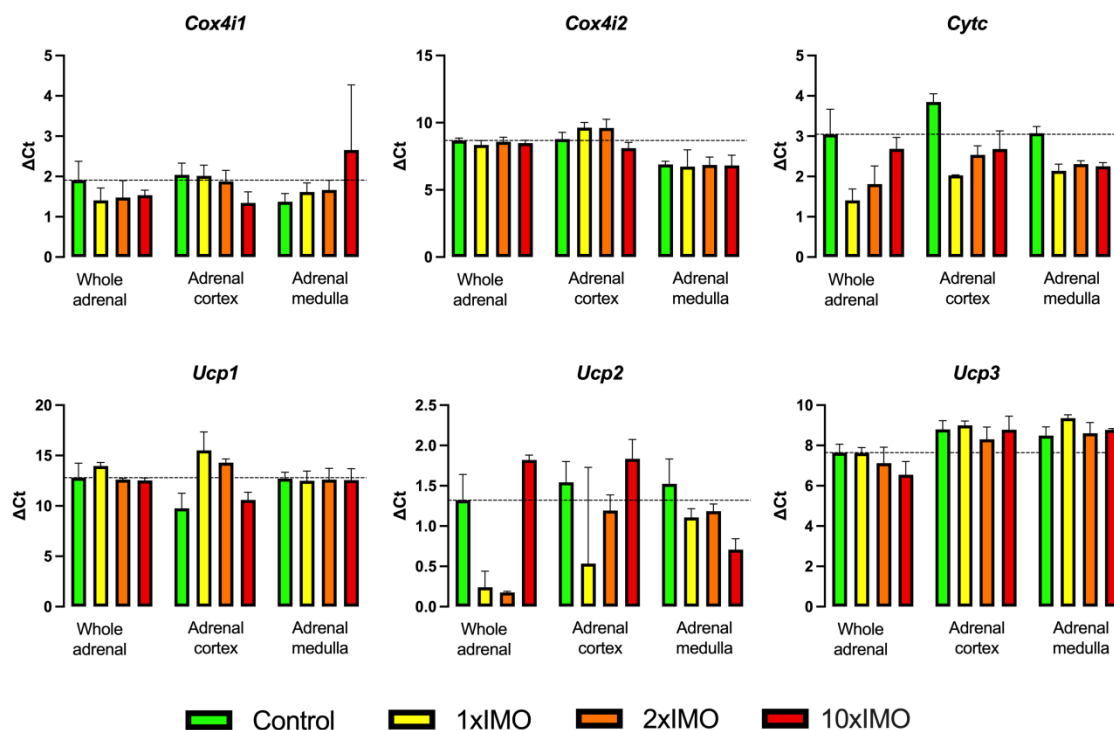

**Supplementary Figure S7.**  $\Delta$ Ct values of the main mitochondrial functionality markers in the whole adrenal gland, adrenal cortex and medulla tissues after one-time, two-times and ten-times repeated psychophysical stress of the entire organism.

Whole adrenal gland tissue, as well as the adrenal cortex and medulla tissues, were isolated from undisturbed, acutely (1xIMO) and repeatedly (2xIMO and 10xIMO) stressed rats. Tissue was further used for RNA isolation followed by the analysis of relative expression of mitochondrial functionality markers. The data bars represent mean  $\pm$  SEM values of two independent *in vivo* experiments.

### $\Delta$ Ct values of adrenergic receptors, adrenergic receptor kinases and glucocorticoid receptor.

Analysis of relative expression of main mitochondrial functionality markers was done using delta delta Ct ( $\Delta\Delta$ Ct) method. In order to analyze difference in relative expression levels of main markers of adrenergic receptors and adrenergic receptor kinases (A) and glucocorticoid receptor (B) in the whole adrenal gland, adrenal cortex and adrenal medulla,  $\Delta$ Ct values were used. Results show that there is no statistical difference in  $\Delta$ Ct values of all the analyzed markers (Supplementary Figure S8).

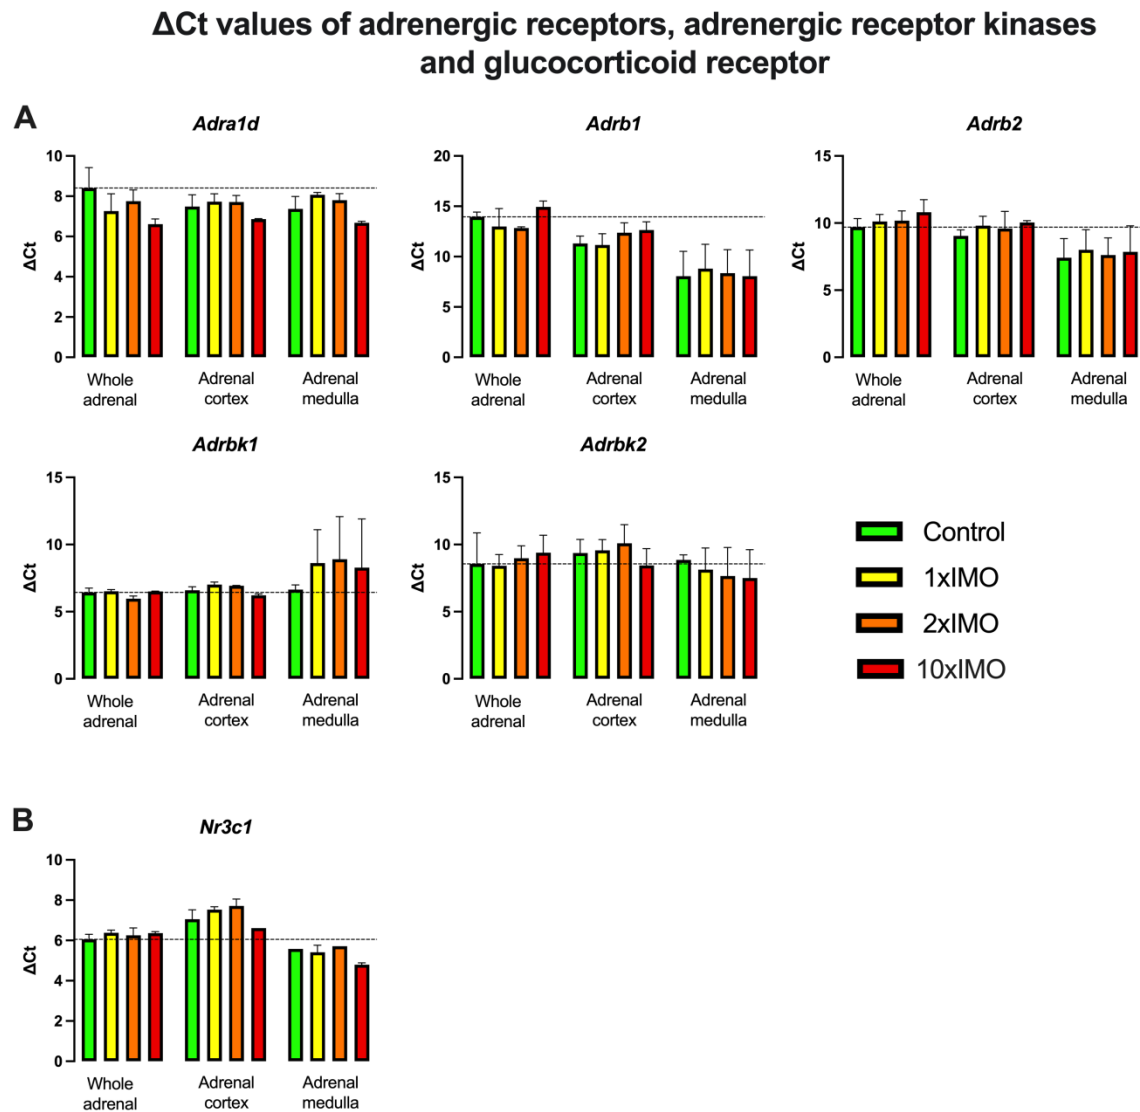

**Supplementary Figure S8.**  $\Delta$ Ct values of the adrenergic receptors, adrenergic receptor kinases and glucocorticoid receptor in the whole adrenal gland, adrenal cortex and medulla tissues after one-time, two-times and ten-times repeated psychophysical stress of the entire organism.

Whole adrenal gland tissue, as well as the adrenal cortex and medulla tissues, were isolated from undisturbed, acutely (1xIMO) and repeatedly (2xIMO and 10xIMO) stressed rats. Tissue was further used for RNA isolation followed by the analysis of relative expression adrenergic receptors and adrenergic receptor kinases (A) and glucocorticoid receptor (B). The data bars represent mean  $\pm$  SEM values of two independent *in vivo* experiments.
